# Supplementary material for: Multispectral Depth-Resolved Fluorescence Lifetime Spectroscopy Using SPAD Array Detectors and Fiber Probes
Source: MDPI journal article supplement (doi:10.3390/s19122678), 2019-06-13
Supplement: s1 [file s1]

# Supplementary Materials

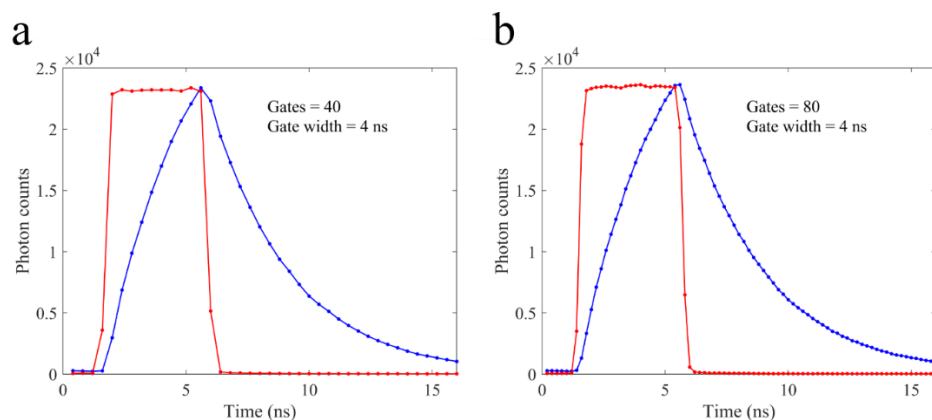

**Figure S1.** Representative instrument response function (in blue) and fluorescence intensity decays of fluorescence standards (in red) at different gate settings: (a) 40 sampling gates and 400 ps delay between gates; (b) 80 sampling gates and 200 ps delay between gates.

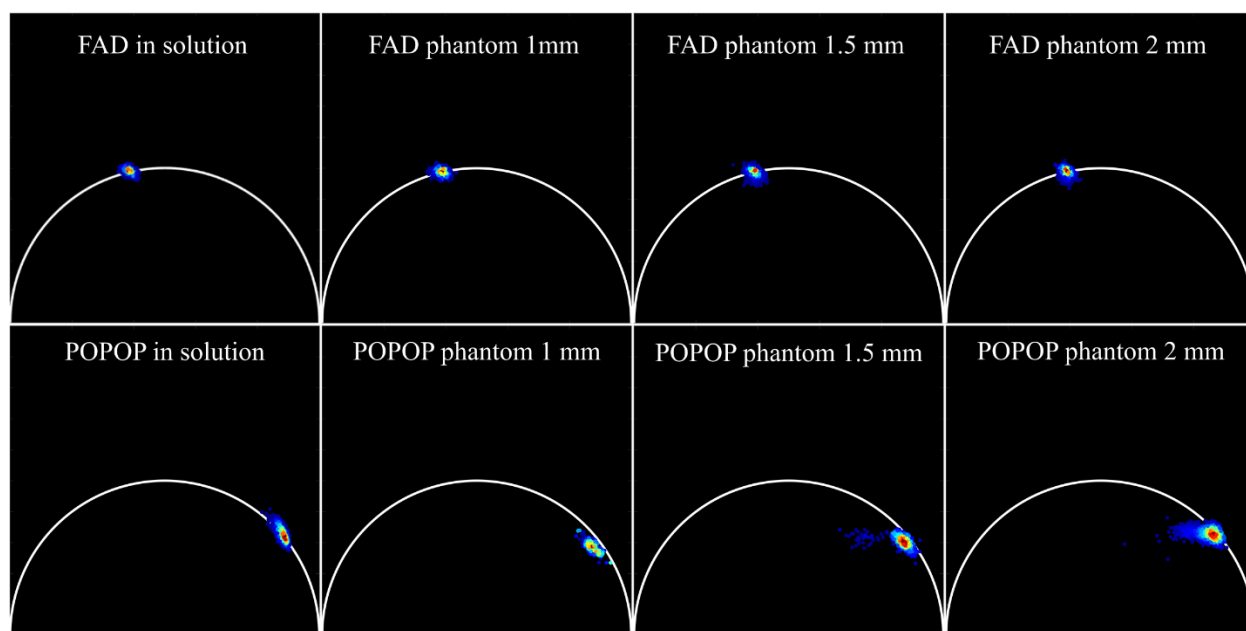

**Figure S2.** Fluorescence lifetime phasor maps of (top) FAD and (bottom) POPOP solutions and agarose phantoms.

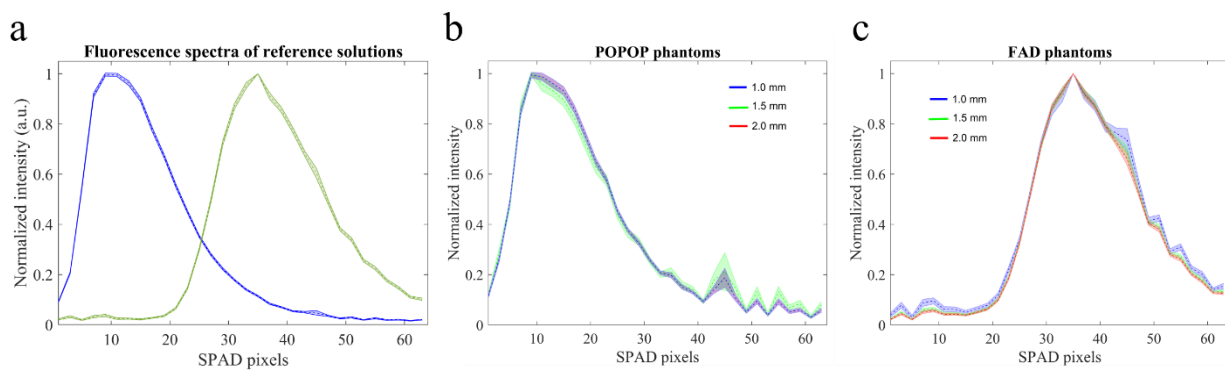

**Figure S3.** Fluorescence spectra of FAD and POPOP (a) solutions and (b, c) agarose phantoms.

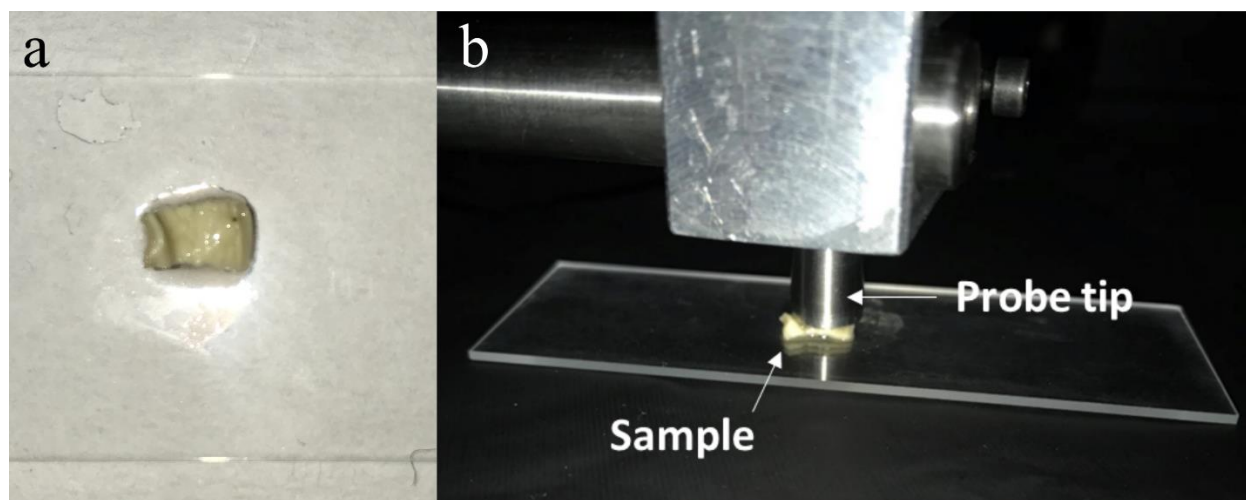

**Figure S4.** (a) Representative rabbit aorta sample on a glass slide; (b) Experimental setup with fiber tip in gentle contact with sample.
